# Supplementary material for: Supergene phases from ferruginous duricrusts: non-destructive microsampling and mineralogy prior to (U-Th)/He geochronological analysis
Source: Copernicus journal article supplement (doi:10.5194/gchron-2022-9), 2022-04-05
Supplement: Supplementary file 1 [file gchron-2022-9-supplement.pdf]

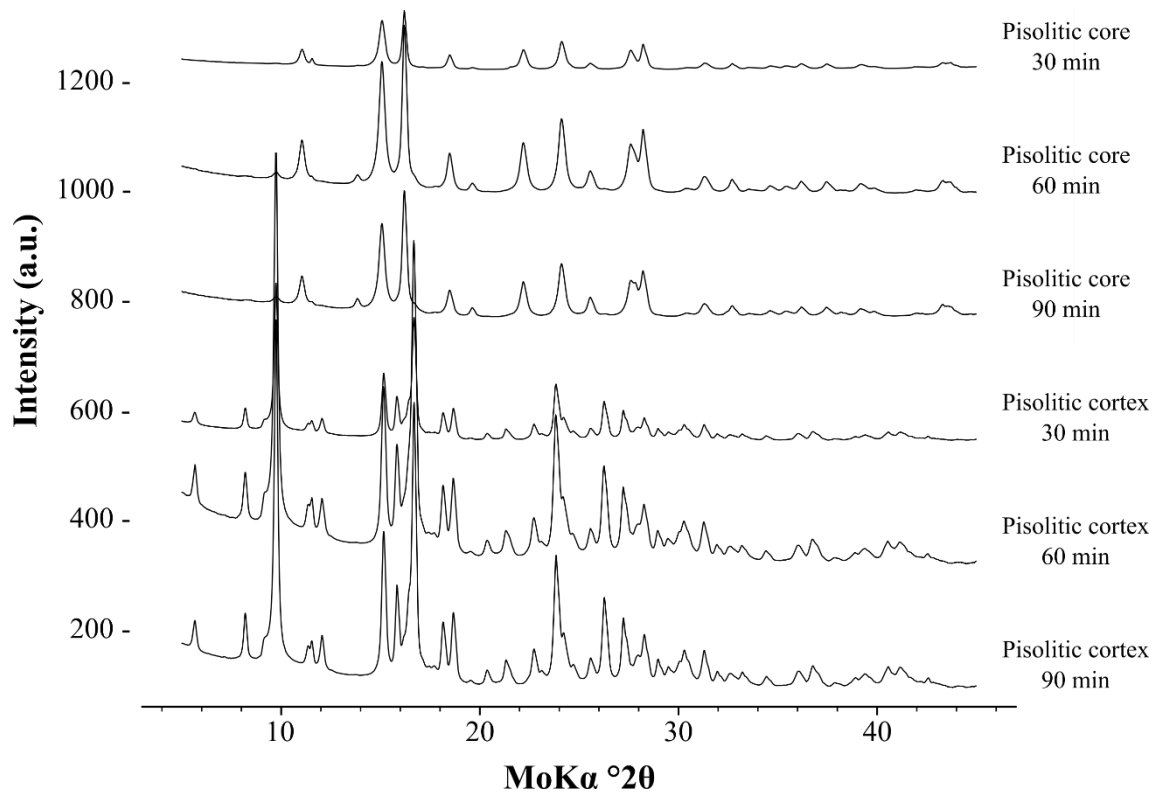

**Figure S1: Rotating anode XRD patterns with different exposure times for grain samples from the pisolitic core and cortex of the ferruginous duricrust.**

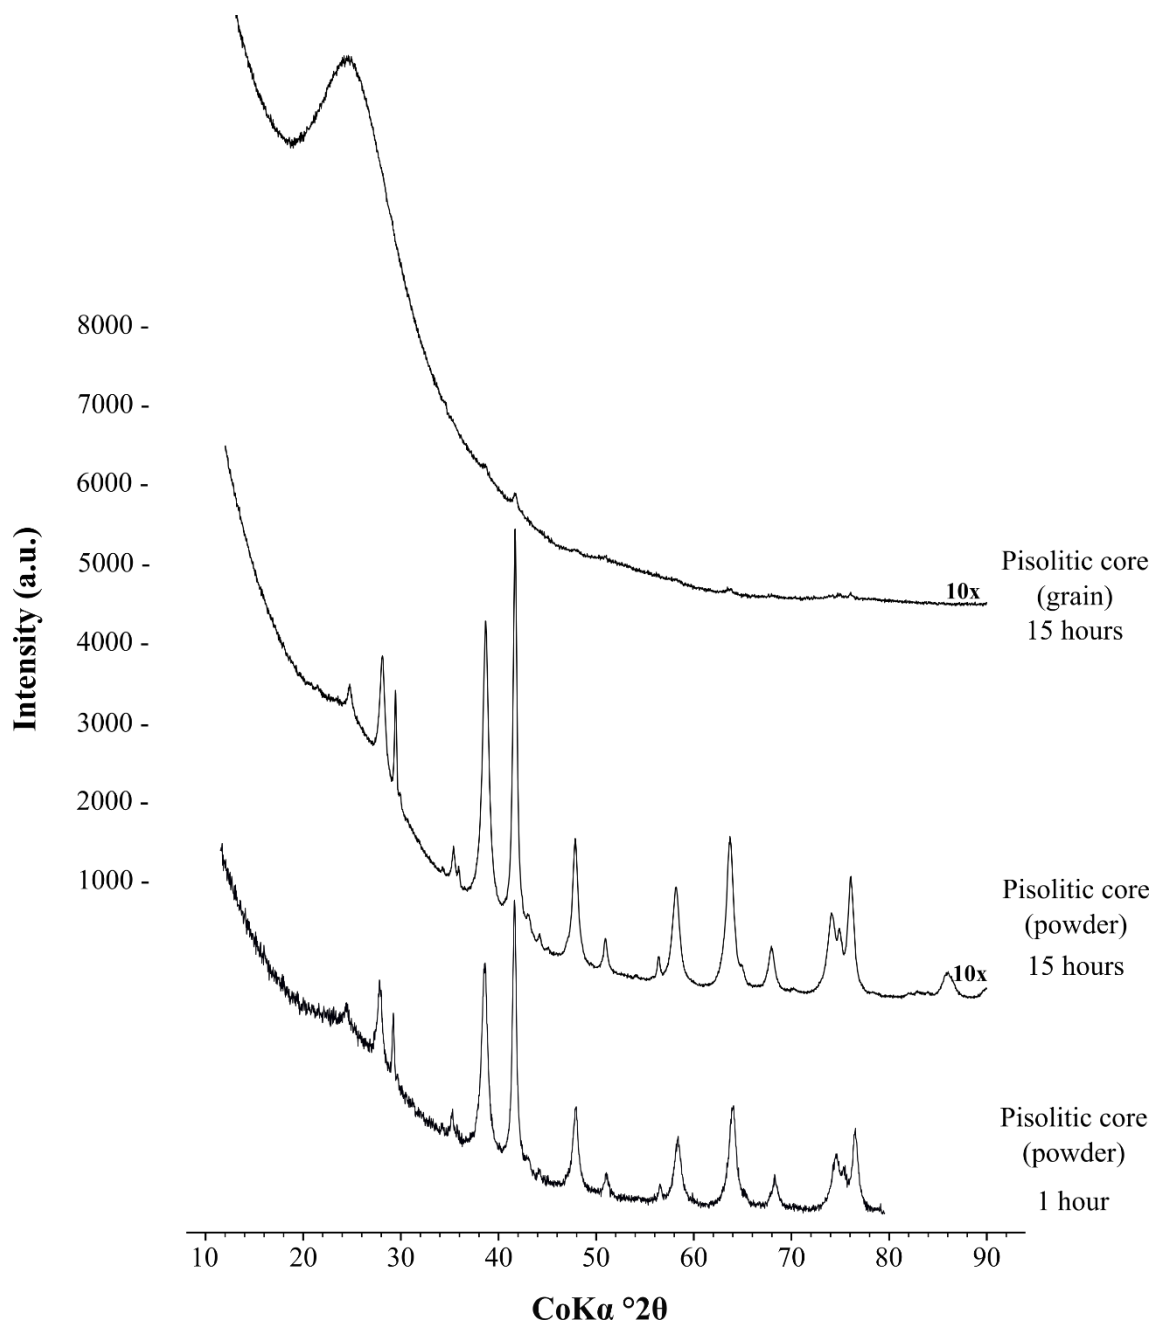

Figure S2: Standard XRD patterns with different exposure times for grain and powder samples loaded in borosilicate capillaries from the pisolitic core of the ferruginous duricrust.
